# Supplementary material for: Short-Term Head-Out Whole-Body Cold-Water Immersion Facilitates Positive Affect and Increases Interaction between Large-Scale Brain Networks
Source: MDPI journal article supplement (doi:10.3390/biology12020211), 2023-01-29
Supplement: s1 [file s1]

Supplementary Materials

# Short-term head-out whole-body cold-water immersion facilitates positive affect and increases interaction between large-scale brain networks

Ala Yankouskaya <sup>1,\*</sup>, Ruth Williamson <sup>2</sup>, Cameron Stacey <sup>1</sup>, John James Totman <sup>3</sup> and Heather Massey <sup>4</sup>

DefaultMode.MPFC (1,55,-3)  
 DefaultMode.LP (L) (-39,-77,33)  
 DefaultMode.LP (R) (47,-67,29)  
 DefaultMode.PCC (1,-61,38)  
 SensoriMotor.Lateral (L) (-55,-12,29)  
 SensoriMotor.Lateral (R) (56,-10,29)  
 SensoriMotor.Superior (0,-31,67)  
 Visual.Medial (2,-79,12)  
 Visual.Occipital (0,-93,-4)  
 Visual.Lateral (L) (-37,-79,10)  
 Visual.Lateral (R) (38,-72,13)  
 Salience.ACC (0,22,35)  
 Salience.AInsula (L) (-44,13,1)  
 Salience.AInsula (R) (47,14,0)  
 Salience.RPFC (L) (-32,45,27)  
 Salience.RPFC (R) (32,46,27)  
 Salience.SMG (L) (-60,-39,31)  
 Salience.SMG (R) (62,-35,32)  
 DorsalAttention.FEF (L) (-27,-9,64)  
 DorsalAttention.FEF (R) (30,-6,64)  
 DorsalAttention.IPS (L) (-39,-43,52)  
 DorsalAttention.IPS (R) (39,-42,54)  
 FrontoParietal.LPFC (L) (-43,33,28)  
 FrontoParietal.LPFC (R) (41,38,30)  
 FrontoParietal.PPC (L) (-46,-58,49)  
 FrontoParietal.PPC (R) (52,-52,45)  
 Language.IFG (L) (-51,26,2)  
 Language.IFG (R) (54,28,1)  
 Language.pSTG (L) (-57,-47,15)  
 Language.pSTG (R) (59,-42,13)  
 Cerebellar.Anterior (0,-63,-30)  
 Cerebellar.Posterior (0,-79,-32)

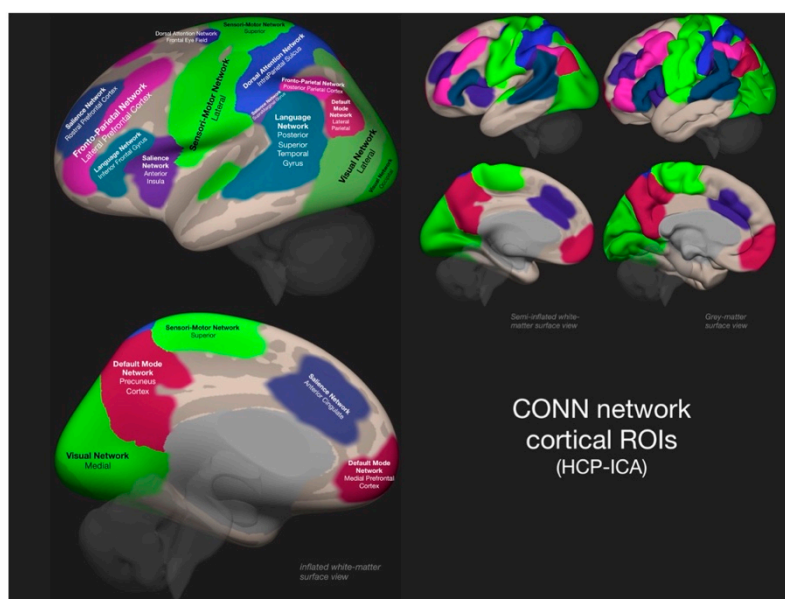

**Figure S1.** Large scale brain networks derived from CONN's atlas (Whitfield-Gabrieli & Nieto-Castanon, 2012) [42].

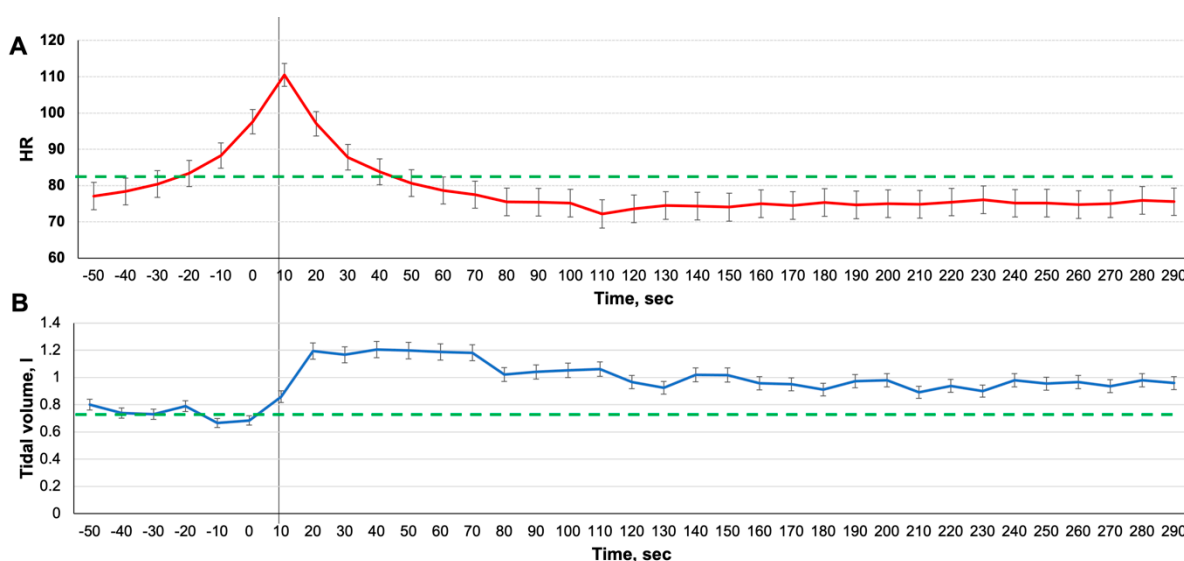

**Figure S2.** Means heart rate (A) and tidal volume (the amount of air that moves in or out of the lungs with each respiratory cycle, B) 60 sec prior CWI (PRE-CWI), CWI (start of cold-water

immersion). The X-axes represents time of CWI. Error bars represent SEM at each time point. Dashed green lines showed the means of the baseline measurements.

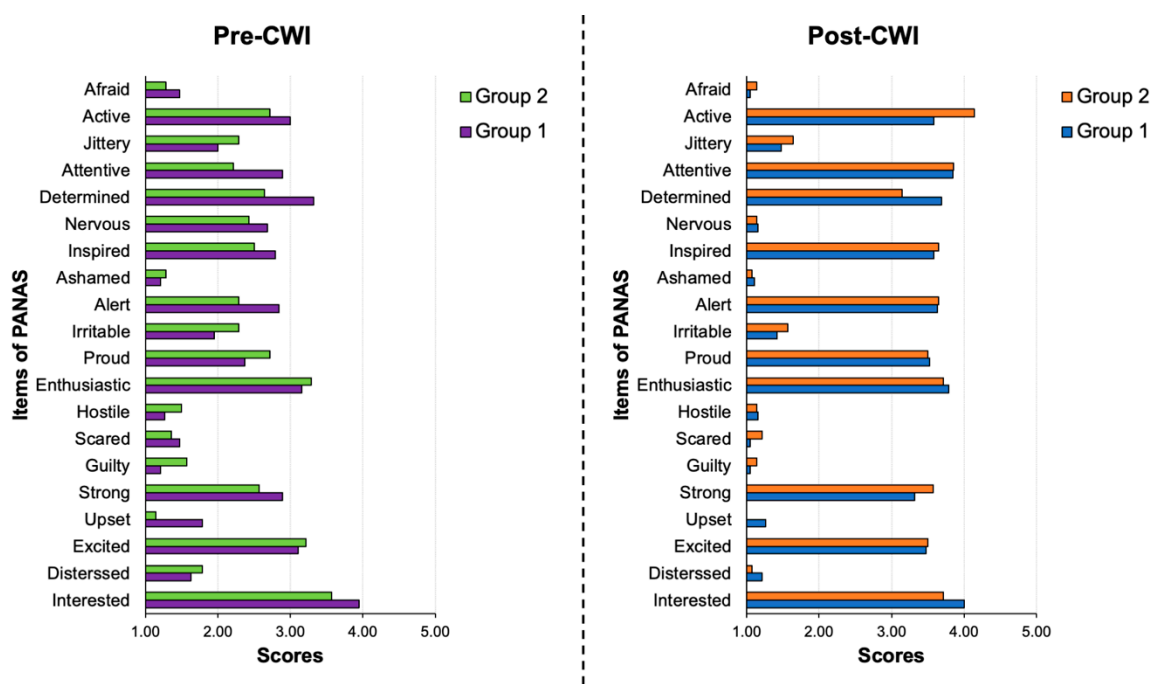

**Figure S3.** Clustered bar plots of individual items of PANAS for Pre-Post-CWI for Group 1 (participants experiences with MRI/fMRI) and Group 2 (participants naïve to MRI/fMRI).

**Table S1.** Individual PANAS scores for Pre-CWI and Post-CWI.

| ID | Pre-positive | Post-positive | Pre-negative | Post-negative |
|----|--------------|---------------|--------------|---------------|
| 1  | 15           | 40            | 29           | 10            |
| 2  | 24           | 28            | 19           | 13            |
| 3  | 32           | 39            | 23           | 22            |
| 4  | 28           | 31            | 23           | 20            |
| 5  | 31           | 31            | 14           | 11            |
| 6  | 21           | 37            | 18           | 10            |
| 7  | 32           | 47            | 17           | 13            |
| 8  | 38           | 39            | 17           | 10            |
| 9  | 16           | 33            | 15           | 13            |
| 10 | 38           | 42            | 18           | 12            |
| 11 | 28           | 46            | 12           | 10            |
| 12 | 32           | 39            | 24           | 12            |
| 13 | 33           | 37            | 12           | 12            |
| 14 | 18           | 34            | 14           | 10            |
| 15 | 26           | 33            | 24           | 12            |
| 16 | 26           | 33            | 11           | 10            |
| 17 | 32           | 41            | 13           | 11            |
| 18 | 32           | 32            | 13           | 10            |
| 19 | 34           | 41            | 15           | 16            |
| 20 | 39           | 38            | 15           | 14            |
| 21 | 22           | 24            | 12           | 10            |
| 22 | 21           | 34            | 25           | 14            |
| 23 | 28           | 36            | 10           | 10            |

|    |    |    |    |    |
|----|----|----|----|----|
| 24 | 21 | 27 | 17 | 10 |
| 25 | 34 | 45 | 11 | 10 |
| 26 | 30 | 31 | 17 | 10 |
| 27 | 43 | 39 | 18 | 12 |
| 28 | 38 | 39 | 13 | 10 |
| 29 | 39 | 40 | 18 | 11 |
| 30 | 22 | 20 | 18 | 12 |
| 31 | 27 | 46 | 11 | 11 |
| 32 | 39 | 41 | 20 | 15 |

**Table S2.** Results of Wilcoxon's signed rank test on individual items of PANAS. W is defined as the smaller of W+ (sum of the positive ranks) and W- (sum of the negative ranks). BF<sub>10</sub> - the Bayes factor in favour of H1 over H0.

| Measures<br>[Pre – Post] | W      | z     | p     | BF <sub>10</sub> |
|--------------------------|--------|-------|-------|------------------|
| Interested               | 43.00  | -0.59 | 0.55  | 0.26             |
| Active                   | 18.00  | -3.25 | <.001 | 79.51            |
| Afraid                   | 48.00  | 2.09  | 0.04  | 1.73             |
| Alert                    | 32.00  | -3.21 | .001  | 83.24            |
| Ashamed                  | 10.00  | 1.83  | .09   | 0.44             |
| Attentive                | 8.00   | -4.06 | <.001 | 1155.12          |
| Determined               | 31.00  | -1.91 | .05   | 1.44             |
| Distressed               | 99.00  | 2.92  | .002  | 22.84            |
| Enthusiastic             | 28.00  | -2.50 | .009  | 5.42             |
| Exited                   | 37.00  | -1.85 | .05   | 0.99             |
| Guilty                   | 28.00  | 2.37  | .02   | 1.35             |
| Hostile                  | 34.50  | 1.42  | .16   | 0.35             |
| Inspired                 | 6.00   | -3.69 | <.001 | 445.06           |
| Irritable                | 84.00  | 2.69  | .007  | 4.55             |
| Jittery                  | 117.00 | 2.56  | .009  | 9.95             |
| Nervous                  | 406.00 | 4.62  | <.001 | 26282.93         |
| Proud                    | 5.00   | -3.51 | <.001 | 1151.66          |
| Scared                   | 41.00  | 2.19  | .03   | 1.19             |
| Strong                   | 64.50  | -2.44 | .01   | 7.08             |
| Upset                    | 45.00  | 2.67  | .006  | 3.87             |

**Table S3.** The results of Network Based Statistic analysis with varied 'height' thresholds for contrast [Post-CWI>Pre-CWI] (p-value for each component was FWE corrected). NS denotes that a component did not survive the FWE correction.

| Height threshold<br>(p< ) | Connections comprising a component | Component statistics |      |             |
|---------------------------|------------------------------------|----------------------|------|-------------|
|                           |                                    | mass                 | size | p-FWE value |
| .05 - .02                 | NS                                 |                      |      |             |
| .01 - .006                | DMN.MPFC-SN.ACC                    |                      |      |             |
|                           | DMN.MPFC-SN.RPFC(L)                |                      |      |             |
|                           | FP.PCC(R)-Vis.Lat(R)               | 357                  | 1    |             |
|                           | FP.PCC(R)-DAN.IPS(R)               |                      |      | .003        |
|                           | DMN.PCC -Vis.Lat (R)               |                      |      |             |
|                           | DMN.MPFC-DMN.LP (L)                |                      |      |             |
|                           | DMN.PCC-LP (R)                     |                      |      |             |

|                |                      |        |   |               |
|----------------|----------------------|--------|---|---------------|
| .005 - .002    | DMN.MPFC-SN.Ains (L) |        |   |               |
|                | DMN.MPFC-SN.ACC      |        |   |               |
|                | DMN.MPFC-SN.RPFC(L)  | 168.06 |   |               |
|                | FP.PCC(R)-Vis.Lat(R) |        | 2 |               |
|                | FP.PCC(R)-DAN.IPS(R) | 165.30 |   |               |
|                | DMN.PCC -Vis.Lat (R) |        |   | .013 - .001   |
|                | DMN.MPFC-DMN.LP (L)  |        |   |               |
|                | DMN.PCC-LP (R)       |        |   |               |
| .001 - .0004   | DMN.MPFC-SN.Ains (L) |        |   |               |
|                | DMN.MPFC-SN.ACC      |        |   |               |
|                | DMN.MPFC-SN.RPFC(L)  | 165.30 |   |               |
|                | FP.PCC(R)-Vis.Lat(R) |        | 2 | < .001 - .001 |
|                | FP.PCC(R)-DAN.IPS(R) | 126.78 |   |               |
|                | DMN.MPFC-DMN.LP (L)  |        |   |               |
| .0005 - .00001 | DMN.MPFC-SN.Ains (L) |        |   |               |
|                | DMN.MPFC-SN.ACC      | 126.78 |   |               |
|                | DMN.MPFC-SN.RPFC(L)  |        |   |               |
|                | FP.PCC(R)-Vis.Lat(R) | 151.22 | 2 | < .001        |
|                | FP.PCC(R)-DAN.IPS(R) |        |   |               |
| .0000009       | DMN.MPFC-DMN.LP (L)  |        |   |               |
|                | FP.PCC(R)-Vis.Lat(R) | 64.23  | 1 | .03           |
| .0000005       | FP.PCC(R)-DAN.IPS(R) |        |   |               |
|                | NS                   |        |   |               |

**Table S4.** The results of Network Based Statistic analysis with varied ‘height’ thresholds for contrast [Post-CWI>Pre-CWI]\*Changes in Positive Affect (p-value for each component was FWE corrected). NS denotes that a component did not survive the FWE correction.

| Height threshold<br>(p< ) | Connections comprising a component | Component statistics |      |               |
|---------------------------|------------------------------------|----------------------|------|---------------|
|                           |                                    | mass                 | size | p-FWE value   |
| .05 - .004                | NS                                 |                      |      |               |
| .003 - .00002             | DMN.MPFC-SN.ACC                    | 102.86               | 2    | .019 - .00002 |
|                           | DMN.MPFC-SN.RPFC(L)                |                      |      |               |
|                           | FP.PCC(R)-Vis.Lat(R)               | 96.62                | 2    | 0.03-0.0004   |
|                           | FP.PCC(R)-DAN.IPS(R)               |                      |      |               |
| .00001 - .00007           | DMN.MPFC-SN.ACC                    | 86.11                | 1    |               |
|                           | FP.PCC(R)-Vis.Lat(R)               |                      |      | .006 - .004   |
|                           | FP.PCC(R)-DAN.IPS(R)               | 96.62                | 2    |               |
| .00006 - .000002          | FP.PCC(R)-DAN.IPS(R)               | 46.90                | 1    | .004 - .04    |
| .000001                   | NS                                 |                      |      |               |

**Table S5.** The results of Network Based Statistic analysis with varied ‘height’ thresholds for contrast [Post-CWI>Pre-CWI]\*Changes in Negative Affect (p-value for each component was FWE corrected). NS denotes that a component did not survive the FWE correction.

| Height threshold<br>(p< ) | Connections comprising a component | Component statistics |      |             |
|---------------------------|------------------------------------|----------------------|------|-------------|
|                           |                                    | mass                 | size | p-FWE value |
| .05 - .03                 | Vis. Lat (R)                       |                      |      |             |
|                           | Vis. Lat (L)                       | 594.50               | 68   | .02         |
|                           | Vis. Med                           |                      |      |             |

|             |                       |        |    |            |
|-------------|-----------------------|--------|----|------------|
|             | DAN.IPS (R)           |        |    |            |
|             | DAN.IPS (L)           |        |    |            |
|             | DAN.FEF (L)           |        |    |            |
|             | SM.Superior           |        |    |            |
|             | SN.RPFC (R)           |        |    |            |
|             | SN.ACC                |        |    |            |
|             | SN.AIns (R)           |        |    |            |
|             | SN.AIns (L)           |        |    |            |
|             | SN.SMG (L)            |        |    |            |
|             | Language.IFG (R)      |        |    |            |
|             | Language.pSTS (R)     |        |    |            |
|             | Language.pSTS (L)     |        |    |            |
|             | Language.IFG (L)      |        |    |            |
|             | FP.LPFC (R)           |        |    |            |
|             | FP.PPC (L)            |        |    |            |
|             | FP.LPFC (L)           |        |    |            |
|             | DMN.MPFC              |        |    |            |
|             | DMN.PCC               |        |    |            |
|             | DMN.LP (R)            |        |    |            |
|             | DMN.LP (L)            |        |    |            |
|             | FP.LPFC (R)           |        |    |            |
|             | DMN.MPFC              |        |    |            |
|             | DMN.PCC               |        |    |            |
|             | DMN.LP (R)            |        |    |            |
|             | DMN.LP (L)            |        |    |            |
| .02         | DAN.IPS (R)           | 387.72 | 30 | .016       |
|             | DAN.IPS (L)           |        |    |            |
|             | DAN.FEF (L)           |        |    |            |
|             | SM.Superior           |        |    |            |
|             | Language.IFG (R)      |        |    |            |
|             | SN.SMG (L)            |        |    |            |
|             | SN.Ains (L)           |        |    |            |
|             | SN.AIns (R)           |        |    |            |
| .01-.001    | DMN.MPFC              | 154.50 | 2  | .003       |
|             | DMN.PCC               |        |    |            |
| .0009-.0001 | FP.PCC(R)->DAN.IPS(R) | 46.90  | 1  | .004 - .04 |
| .000001     | NS                    |        |    |            |
